# Supplementary material for: A new genus and species of frog from the Kem Kem (Morocco), the second neobatrachian from Cretaceous Africa
Source: PeerJ. 2022 Jul 15;10:e13699. doi: 10.7717/peerj.13699 (PMC9291016; doi:10.7717/peerj.13699)
Supplement: Table S1 [file peerj-10-13699-s003.xlsx]

## Sheet: Feuil1
			MorphoSource ARK
Specimen number	Element	Taxon	CT-Scan files	DOI	3D Models	DOI
UCRC-PV94	Incomplete posterior braincase	Cretadhefdaa taouzensis	ark:/87602/m4/M168041	https://doi.org/10.17602/M2/M168041	ark:/87602/m4/426969	https://doi.org/10.17602/M2/M427199
UCRC-PV94_Inner ear	Endocast of Inner Ear	Cretadhefdaa taouzensis	ark:/87602/m4/M168041	https://doi.org/10.17602/M2/M168041	ark:/87602/m4/427199	https://doi.org/10.17602/M2/M427199
UCRC-PV95	Incomplete squamosal	Cretadhefdaa taouzensis	ark:/87602/m4/351726	https://doi.org/10.17602/M2/M351726	ark:/87602/m4/427218	https://doi.org/10.17602/M2/M427218
UCRC-PV96	Incomplete maxilla	Cretadhefdaa taouzensis	ark:/87602/m4/389771	https://doi.org/10.17602/M2/M389771	ark:/87602/m4/427196	https://doi.org/10.17602/M2/M427196
UCRC-PV97	presacral vertebra	Cretadhefdaa taouzensis	ark:/87602/m4/351731	https://doi.org/10.17602/M2/M351731	ark:/87602/m4/427215	https://doi.org/10.17602/M2/M427215
UCRC-PV98	presacral vertebra	Cretadhefdaa taouzensis	ark:/87602/m4/351736	https://doi.org/10.17602/M2/M351736	ark:/87602/m4/427212	https://doi.org/10.17602/M2/M427212
UCRC-PV101	presacral vertebra	Cretadhefdaa taouzensis	ark:/87602/m4/351753	https://doi.org/10.17602/M2/M351753	ark:/87602/m4/427227	https://doi.org/10.17602/M2/M427227
UCRC-PV103	Sacral vertebra	Cretadhefdaa taouzensis	ark:/87602/m4/351822	https://doi.org/10.17602/M2/M351822	ark:/87602/m4/427202	https://doi.org/10.17602/M2/M427202
UCRC-PV104	Humerus	Neobatrachia ?	ark:/87602/m4/351812	https://doi.org/10.17602/M2/M351812	ark:/87602/m4/427209	https://doi.org/10.17602/M2/M427209
UCRC-PV105	Ilium	Anura Indet.	ark:/87602/m4/351817	https://doi.org/10.17602/M2/M351817	ark:/87602/m4/427206	https://doi.org/10.17602/M2/M427206
